# Supplementary material
Source: Springer Nature journal article supplement (https://www.springermedizin.de/resource/supplementary/40478_2013_77_MOESM4_ESM.pdf/25658106)

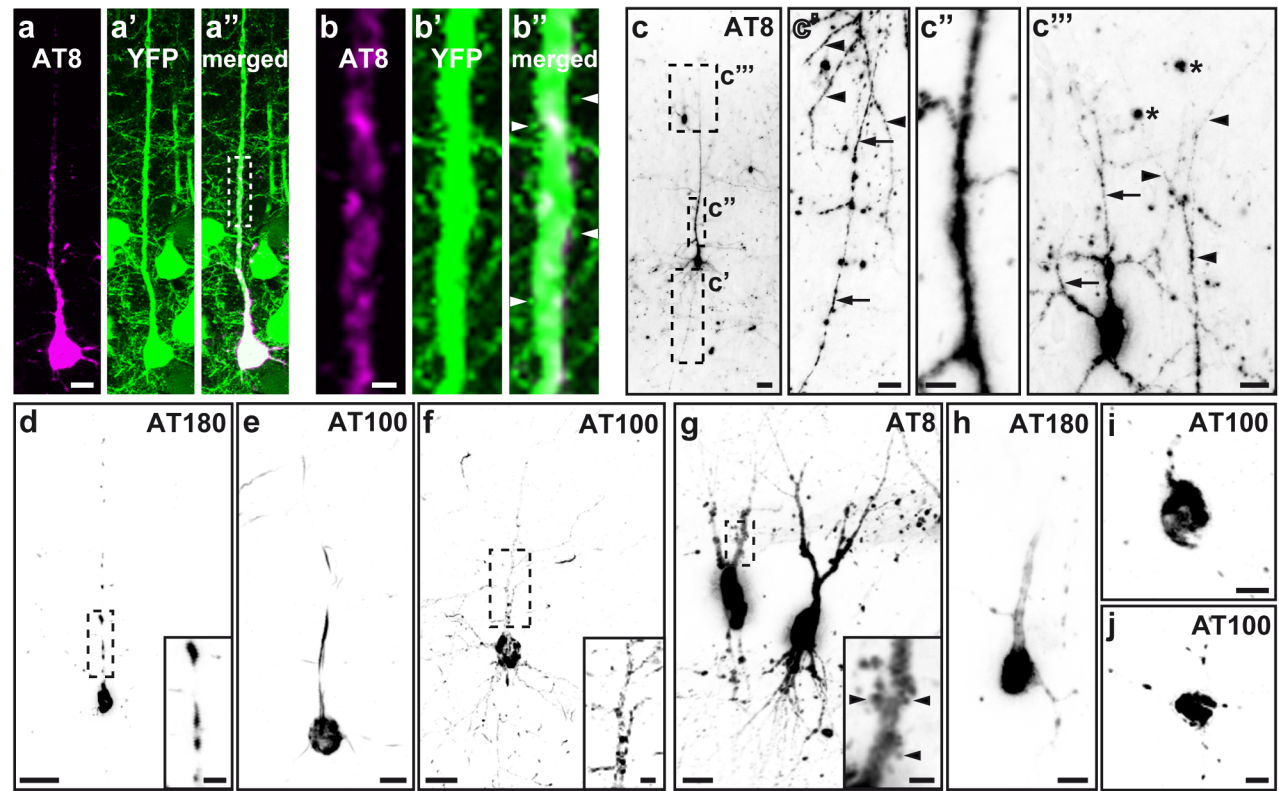

Supplement: MOESM4 [file 25658106]
